# Supplementary material for: Alkaline-earth metal substitution stabilizes the anionic redox of Li-rich oxides
Source: Royal Society of Chemistry journal article supplement (doi:10.1039/d1ta00282a), 2021-01-01
Supplement: d1ta00282a1.pdf [file d1ta00282a1.pdf]

## **Supporting Information**

# **Alkaline-earth Metal Substitution Stabilizes Anionic Redox of Li-rich Oxides**

Haoxin Li<sup>ab</sup>, Xiaolin Zhao<sup>ac</sup>, Yining Li<sup>ac</sup>, Yang Gan<sup>ac</sup>, Wujie Qiu<sup>\*ac</sup>, Jifen Wang<sup>\*b</sup>, and Jianjun Liu<sup>\*acd</sup>

<sup>a</sup>State Key Laboratory of High Performance Ceramics and Superfine Microstructure, Shanghai Institute of Ceramics, Chinese Academy of Sciences, 1295 Dingxi Road, Shanghai 200050, China

<sup>b</sup>School of Science, College of Art and Science, Shanghai Polytechnic University, 2360 Jinhai Road, Shanghai 201209, China

<sup>c</sup>Center of Materials Science and Optoelectronics Engineering, University of Chinese Academy of Sciences, Beijing 100049, China

<sup>d</sup>School of Chemistry and Materials Science, Hangzhou Institute for Advanced Study, University of Chinese Academy of Science, 1 Sub-lane Xiangshan, Hangzhou, 310024, China

\*Email: [jliu@mail.sic.ac.cn](mailto:jliu@mail.sic.ac.cn); [wjqu1988@gmail.com](mailto:wjqiu1988@gmail.com); [wangjifen@sspu.edu.cn](mailto:wangjifen@sspu.edu.cn)

## Calculation Details

The average voltage can be calculated from the free energy of the delithiation reaction:

$$V(x_1, x_2) = \frac{E(\text{Li}_{x_1}\text{Mg}_{0.5}\text{MnO}_3) - E(\text{Li}_{x_2}\text{Mg}_{0.5}\text{MnO}_3) - (x_1 - x_2)E(\text{Li})}{(x_1 - x_2)F}$$

$(x_1 > x_2)$

where  $E(\text{Li}_{x_1}\text{Mg}_{0.5}\text{MnO}_3)$  and  $E(\text{Li}_{x_2}\text{Mg}_{0.5}\text{MnO}_3)$  are the DFT energies ( $T = 0$  K).  $E(\text{Li})$  is the DFT energy ( $T = 0$  K) with bulk Li metal as the reference state.  $F$  is the Faraday constant. The oxygen vacancy formation energy can be used to determine the structural stability of  $\text{O}_2$  loss in  $\text{Li}_{1.5-x}\text{Mg}_{0.5}\text{MnO}_3$  during delithiation.

$$\Delta E_{vac} = E(\text{Li}_{1.5-x}\text{Mg}_{0.5}\text{MnO}_{3-\delta}) + \delta/2\mu(\text{O}_2) - E(\text{Li}_{1.5-x}\text{Mg}_{0.5}\text{MnO}_3)$$

where  $E(\text{Li}_{1.5-x}\text{Mg}_{0.5}\text{MnO}_{3-\delta})$  represents the energy of  $\text{Li}_{1.5-x}\text{Mg}_{0.5}\text{MnO}_3$  to remove the O atom (with the highest oxidation state was selected as the defect site), and  $\mu(\text{O}_2)$  represent the chemical potential of oxygen at 300 K and 1 atm. The Crystal Orbital Hamilton Populations (COHP) analysis was performed using the Lobster program. The relative formation energy is used to evaluate the stability of  $\text{Li}_{3-x}\text{Mg}_x\text{TMO}_4$  and  $\text{Li}_3\text{Mg}_x\text{TM}_{1-x}\text{O}_4$  (TM=V, Nb):

$$\Delta H = \frac{E(\text{Li}_{3-x}\text{Mg}_x\text{TMO}_4) - (E(\text{Li}_3\text{Mg}_x\text{TM}_{1-x}\text{O}_4) + \frac{x}{2}E(\text{TM}_2\text{O}_5) - \frac{x}{2}E(\text{Li}_2\text{O}) - x\mu(\text{O}_2))}{n}$$

where  $E(\text{TM}_2\text{O}_5)$  and  $E(\text{Li}_2\text{O})$  are the ground state of  $\text{TM}_2\text{O}_5$  and  $\text{Li}_2\text{O}$  compounds, respectively.  $E(\text{Li}_{3-x}\text{Mg}_x\text{TMO}_4)$  and  $E(\text{Li}_3\text{Mg}_x\text{TM}_{1-x}\text{O}_4)$  are the total energy of the generated material, and  $\mu(\text{O}_2)$  uses the chemical potential at temperature (300 K) and pressure (1 atm). Further, their free energy differences are computed through the

formula of  $\Delta G_f = \Delta H_f - \Delta S * T$  (T=300K).

The average charge state of atoms at the same site is calculated through  $\bar{v} = n_{valence} - \bar{n}_{mag}$ , in which  $n_{valence}$  and  $\bar{n}_{mag}$  are valence electron number and average magnetic moment number of atoms at the same site.

## Supplementary Tables

**Table S1.** Calculated energies (0K) and chemical potentials (300K) of the reference substances.

| Compounds                           | Total Energy (eV/atom) |
|-------------------------------------|------------------------|
| E(Li <sub>2</sub> CO <sub>3</sub> ) | -6.19                  |
| E(MnCO <sub>3</sub> )               | -7.86                  |
| E(MgO)                              | -5.99                  |
| $\mu$ (CO <sub>2</sub> )            | -7.74                  |
| $\mu$ (O <sub>2</sub> )             | -5.16                  |

**Table S2.** Total energies of Mg-substituting-Li compounds with the different substitution concentrations.

| Mg concentration (%) | Mg-substituted-Li                                                 | Total Energy (eV/atom) |
|----------------------|-------------------------------------------------------------------|------------------------|
| 3.125                | Li <sub>31</sub> Mg <sub>1</sub> Mn <sub>16</sub> O <sub>48</sub> | -18.58                 |
| 6.250                | Li <sub>30</sub> Mg <sub>2</sub> Mn <sub>16</sub> O <sub>48</sub> | -18.62                 |
| 9.375                | Li <sub>29</sub> Mg <sub>3</sub> Mn <sub>16</sub> O <sub>48</sub> | -18.66                 |
| 12.500               | Li <sub>28</sub> Mg <sub>4</sub> Mn <sub>16</sub> O <sub>48</sub> | -18.70                 |
| 18.750               | Li <sub>26</sub> Mg <sub>6</sub> Mn <sub>16</sub> O <sub>48</sub> | -18.77                 |
| 25.000               | Li <sub>24</sub> Mg <sub>8</sub> Mn <sub>16</sub> O <sub>48</sub> | -18.84                 |
| 28.125               | Li <sub>23</sub> Mg <sub>9</sub> Mn <sub>16</sub> O <sub>48</sub> | -18.89                 |

**Table S3.** Total energies of Mg-substituting-Li and Li-vacancy compounds with the different substitution concentrations.

| Mg concentration (%) | Mg-substituted-Li with Li vacancy                      | Total Energy (eV/ atom) |
|----------------------|--------------------------------------------------------|-------------------------|
| 3.125                | $\text{Li}_{30}\text{Mg}_1\text{Mn}_{16}\text{O}_{48}$ | -18.43                  |
| 6.250                | $\text{Li}_{28}\text{Mg}_2\text{Mn}_{16}\text{O}_{48}$ | -18.30                  |
| 9.375                | $\text{Li}_{26}\text{Mg}_3\text{Mn}_{16}\text{O}_{48}$ | -18.18                  |
| 12.500               | $\text{Li}_{24}\text{Mg}_4\text{Mn}_{16}\text{O}_{48}$ | -18.06                  |
| 18.750               | $\text{Li}_{20}\text{Mg}_6\text{Mn}_{16}\text{O}_{48}$ | -17.82                  |
| 25.000               | $\text{Li}_{16}\text{Mg}_8\text{Mn}_{16}\text{O}_{48}$ | -17.57                  |
| 28.125               | $\text{Li}_{14}\text{Mg}_9\text{Mn}_{16}\text{O}_{48}$ | -17.46                  |

**Table S4.** Total energies of Mg-substituting-Mn and Mn-vacancy compounds with the different substitution concentrations.

| Mg concentration (%) | Mg-substituted-Mn                                      | Total Energy (eV/atom) |
|----------------------|--------------------------------------------------------|------------------------|
| 6.250                | $\text{Li}_{32}\text{Mg}_1\text{Mn}_{15}\text{O}_{48}$ | -18.33                 |
| 12.500               | $\text{Li}_{32}\text{Mg}_2\text{Mn}_{14}\text{O}_{48}$ | -18.11                 |
| 18.750               | $\text{Li}_{32}\text{Mg}_3\text{Mn}_{13}\text{O}_{48}$ | -17.88                 |
| 25.000               | $\text{Li}_{32}\text{Mg}_4\text{Mn}_{12}\text{O}_{48}$ | -17.66                 |
| 37.500               | $\text{Li}_{32}\text{Mg}_6\text{Mn}_{10}\text{O}_{48}$ | -17.22                 |
| 50.000               | $\text{Li}_{32}\text{Mg}_8\text{Mn}_8\text{O}_{48}$    | -16.78                 |
| 56.250               | $\text{Li}_{32}\text{Mg}_9\text{Mn}_7\text{O}_{48}$    | -16.55                 |

**Table S5.** Total energies of the 6 lowest energy structures of  $\text{Li}_{1.5}\text{Mg}_{0.5}\text{MnO}_3$ .

| Configuration of<br>$\text{Li}_{1.5}\text{Mg}_{0.5}\text{MnO}_3$ | Total energy (eV/atom) | Relative energy(eV/atom) |
|------------------------------------------------------------------|------------------------|--------------------------|
| S <sub>1</sub>                                                   | -18.8647               | 0.0000                   |
| S <sub>2</sub>                                                   | -18.8422               | 0.0225                   |
| S <sub>3</sub>                                                   | -18.8272               | 0.0375                   |
| S <sub>4</sub>                                                   | -18.7181               | 0.1466                   |
| S <sub>5</sub>                                                   | -18.7050               | 0.1597                   |
| S <sub>6</sub>                                                   | -18.6031               | 0.2616                   |



**Table S6.** The total energy of the 6 lowest energy structures of  $\text{Li}_{1.25}\text{Mg}_{0.5}\text{MnO}_3$ .

| Configuration of<br>$\text{Li}_{1.25}\text{Mg}_{0.5}\text{MnO}_3$ | Total energy (eV/atom) | Relative energy(eV/atom) |
|-------------------------------------------------------------------|------------------------|--------------------------|
| S <sub>1</sub>                                                    | -18.2013               | 0.0000                   |
| S <sub>2</sub>                                                    | -18.2009               | 0.0003                   |
| S <sub>3</sub>                                                    | -18.1950               | 0.0063                   |
| S <sub>4</sub>                                                    | -18.0806               | 0.1206                   |
| S <sub>5</sub>                                                    | -17.9544               | 0.2469                   |
| S <sub>6</sub>                                                    | -17.8625               | 0.3388                   |

**Table S7.** The total energy of the 6 lowest energy structures of  $\text{Li}_{1.0}\text{Mg}_{0.5}\text{MnO}_3$ .

| Configuration of<br>$\text{Li}_{1.0}\text{Mg}_{0.5}\text{MnO}_3$ | Total energy (eV/atom) | Relative energy(eV/atom) |
|------------------------------------------------------------------|------------------------|--------------------------|
| S <sub>1</sub>                                                   | -17.5766               | 0.0000                   |
| S <sub>2</sub>                                                   | -17.5738               | 0.0028                   |
| S <sub>3</sub>                                                   | -17.5734               | 0.0031                   |
| S <sub>4</sub>                                                   | -17.5281               | 0.0484                   |
| S <sub>5</sub>                                                   | -17.4953               | 0.0813                   |
| S <sub>6</sub>                                                   | -17.4822               | 0.0944                   |

**Table S8.** The total energy of the 6 lowest energy structures of  $\text{Li}_{0.625}\text{Mg}_{0.5}\text{MnO}_3$ .

| Configuration of<br>$\text{Li}_{0.625}\text{Mg}_{0.5}\text{MnO}_3$ | Total energy (eV/atom) | Relative energy(eV/atom) |
|--------------------------------------------------------------------|------------------------|--------------------------|
| S <sub>1</sub>                                                     | -16.4588               | 0.0000                   |
| S <sub>2</sub>                                                     | -16.4434               | 0.0153                   |
| S <sub>3</sub>                                                     | -16.4359               | 0.0228                   |
| S <sub>4</sub>                                                     | -16.4216               | 0.0372                   |
| S <sub>5</sub>                                                     | -16.3966               | 0.0622                   |
| S <sub>6</sub>                                                     | -16.3956               | 0.0631                   |

**Table S9.** The total energy of the 6 lowest energy structures of  $\text{Li}_{0.375}\text{Mg}_{0.5}\text{MnO}_3$ .

| Configuration of<br>$\text{Li}_{0.375}\text{Mg}_{0.5}\text{MnO}_3$ | Total energy (eV/atom) | Relative total<br>energy(eV/atom) |
|--------------------------------------------------------------------|------------------------|-----------------------------------|
| S <sub>1</sub>                                                     | -15.6619               | 0.0000                            |
| S <sub>2</sub>                                                     | -15.6491               | 0.0128                            |
| S <sub>3</sub>                                                     | -15.6394               | 0.0225                            |
| S <sub>4</sub>                                                     | -15.6331               | 0.0288                            |
| S <sub>5</sub>                                                     | -15.5638               | 0.0981                            |
| S <sub>6</sub>                                                     | -15.5472               | 0.1147                            |

**Table S10.** The total energy of the 6 lowest energy structures of  $\text{Li}_{0.25}\text{Mg}_{0.5}\text{MnO}_3$ .

| Configuration of<br>$\text{Li}_{0.25}\text{Mg}_{0.5}\text{MnO}_3$ | Total energy (eV/atom) | Relative total<br>energy(eV/atom) |
|-------------------------------------------------------------------|------------------------|-----------------------------------|
| S <sub>1</sub>                                                    | -15.2538               | 0.0000                            |
| S <sub>2</sub>                                                    | -15.2534               | 0.0003                            |
| S <sub>3</sub>                                                    | -15.2434               | 0.0103                            |
| S <sub>4</sub>                                                    | -15.2403               | 0.0134                            |
| S <sub>5</sub>                                                    | -15.2206               | 0.0331                            |
| S <sub>6</sub>                                                    | -15.2175               | 0.0363                            |

**Table S11.** The reversible capacity of  $\text{Li}_2\text{MnO}_3$  and Mg-doped  $\text{Li}_2\text{MnO}_3$  reported in the literature.

| Compound                                       | Reversible capacity<br>(mAh/g) | Reference                                     |
|------------------------------------------------|--------------------------------|-----------------------------------------------|
| $\text{Li}_2\text{MnO}_3$                      | 120                            | <i>J. Electrochem. Soc.</i> , 2012, 159, A781 |
|                                                | 128                            | <i>Electrochem. Commun.</i> , 2004, 6, 1085   |
|                                                | 115                            | <i>Chem. Mater.</i> , 2015, 27, 3456          |
|                                                | 115                            | This work                                     |
| $\text{Li}_{1.98}\text{Mg}_{0.01}\text{MnO}_3$ | 260                            | <i>J. Power Sources</i> , 2016, 330, 37       |
|                                                | 245                            | This work                                     |

**Table S12.** The bond length changes of different O-O bonding types during the delithiation process.

| Type                                                   | O-O bond length (Å)<br>(Mg-O-Li & Mg-O-Li) | O-O bond length (Å)<br>(Li-O-Li & Mg-O-Li) | O-O bond length (Å)<br>(Li-O-Li & Li-O-Li) |
|--------------------------------------------------------|--------------------------------------------|--------------------------------------------|--------------------------------------------|
| Li <sub>1.5</sub> Mg <sub>0.5</sub> MnO <sub>3</sub>   | 2.880                                      | 2.631                                      | 2.718                                      |
| Li <sub>1.25</sub> Mg <sub>0.5</sub> MnO <sub>3</sub>  | 2.844                                      | 2.545                                      | 2.570                                      |
| Li <sub>1</sub> Mg <sub>0.5</sub> MnO <sub>3</sub>     | 2.791                                      | 2.505                                      | 1.445                                      |
| Li <sub>0.625</sub> Mg <sub>0.5</sub> MnO <sub>3</sub> | 2.717                                      | 2.441                                      | 1.348                                      |
| Li <sub>0.375</sub> Mg <sub>0.5</sub> MnO <sub>3</sub> | 2.741                                      | 2.422                                      | 1.323                                      |
| Li <sub>0.25</sub> Mg <sub>0.5</sub> MnO <sub>3</sub>  | 2.681                                      | 1.440                                      | 1.309                                      |

**Table S13.** Magnetic moment and valence state of atoms at same site in the three compounds.

| Compound                                             | Element | Average magnetic moment | Average valence state |
|------------------------------------------------------|---------|-------------------------|-----------------------|
| MgO                                                  | Mg      | 0.00                    | +2.00                 |
|                                                      | O       | 0.00                    | -2.00                 |
| Li <sub>2</sub> MnO <sub>3</sub>                     | Mn      | 3.15                    | +3.85                 |
|                                                      | O       | 0.06                    | -1.94                 |
|                                                      | Mn1     | 3.20                    | +3.80                 |
| Li <sub>1.5</sub> Mg <sub>0.5</sub> MnO <sub>3</sub> | Mn2     | 3.85                    | +3.15                 |
|                                                      | Mg      | 0.01                    | +1.99                 |
|                                                      | O       | 0.03                    | -1.97                 |



**Table S14.** Relative formation energies were calculated for the substitution of the Li and TM sites by Mg in  $\text{Li}_{2.125}\text{Mg}_{0.875}\text{VO}_4$  and  $\text{Li}_{2.125}\text{Mg}_{0.875}\text{NbO}_4$ .

| Compounds | Relative formation energy (eV/atom) |
|-----------|-------------------------------------|
| V         | -0.417                              |
| Nb        | -0.401                              |

## Supplementary Figures

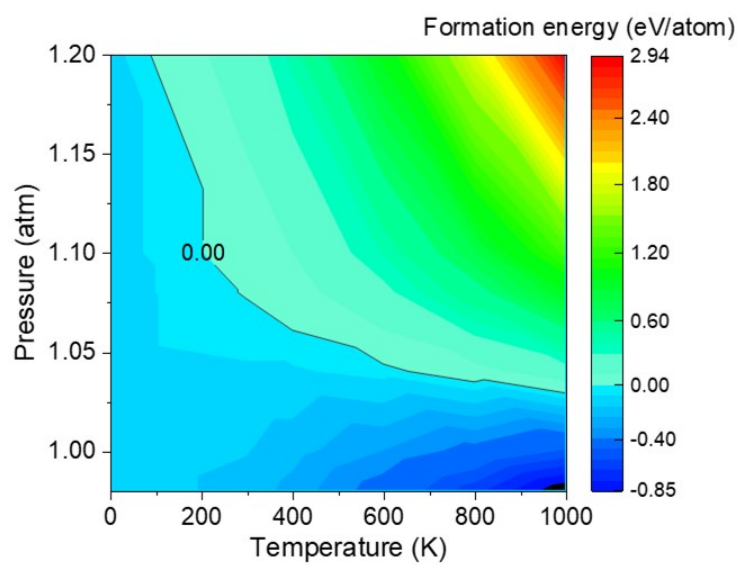

**Figure S1.** The formation energy of  $\text{Li}_{1.5}\text{Mg}_{0.5}\text{MnO}_3$  as a function of temperature and pressure.

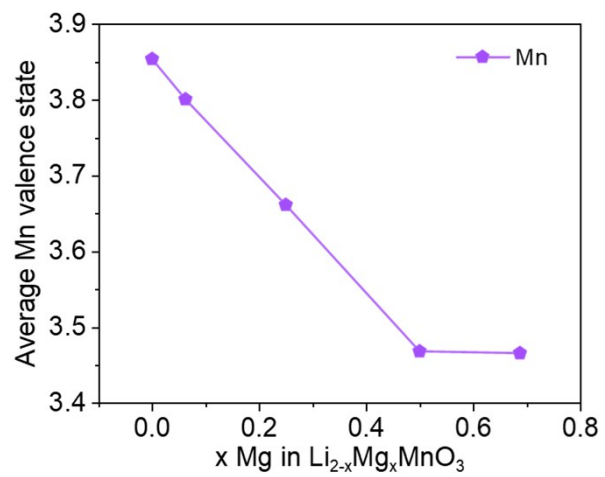

**Figure S2.** The change in the valence state of Mn ions in the state of increasing Mg proportion was obtained from the magnetic moment.

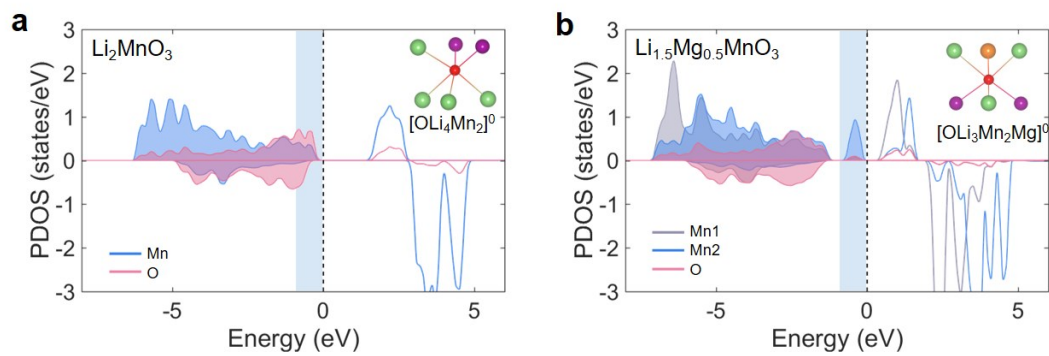

**Figure S3.** The pDOS of Mn and O in the O octahedra of  $\text{Li}_2\text{MnO}_3$  (a) and  $\text{Li}_{1.5}\text{Mg}_{0.5}\text{MnO}_3$  (b).

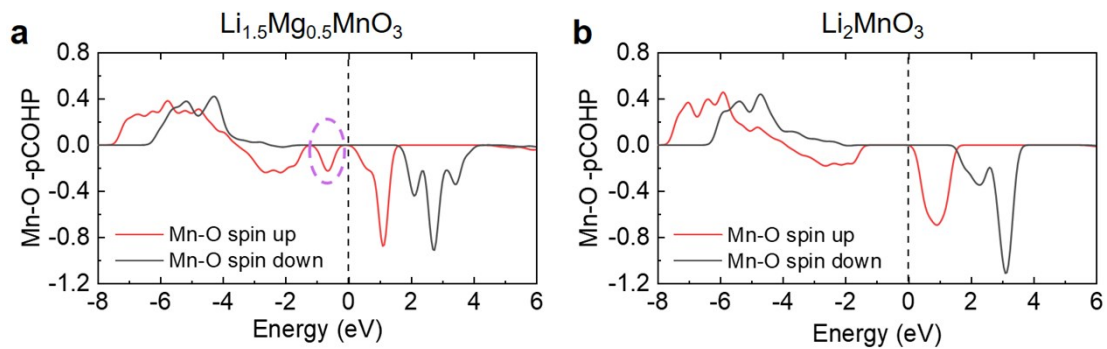

**Figure S4.** The pCOHP results for Mn-O bonds of  $\text{Li}_{1.5}\text{Mg}_{0.5}\text{MnO}_3$  and  $\text{Li}_2\text{MnO}_3$ . Above zero is the bonding state and below zero is the anti-bonding state.

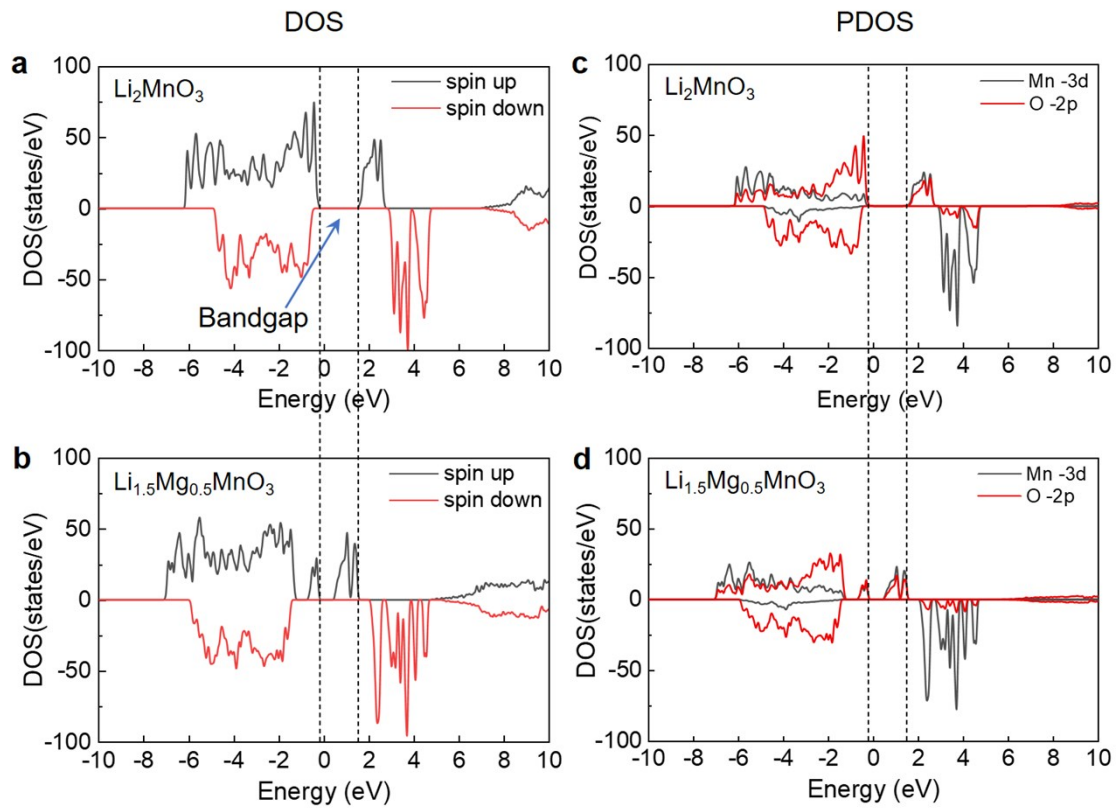

**Figure S5.** The TDOS and pDOS of LMO and LMMO are based on spin-up and spin-down, and the pDOS is based on  $3d$  orbitals of TM atoms and  $2p$  orbitals of O atoms.

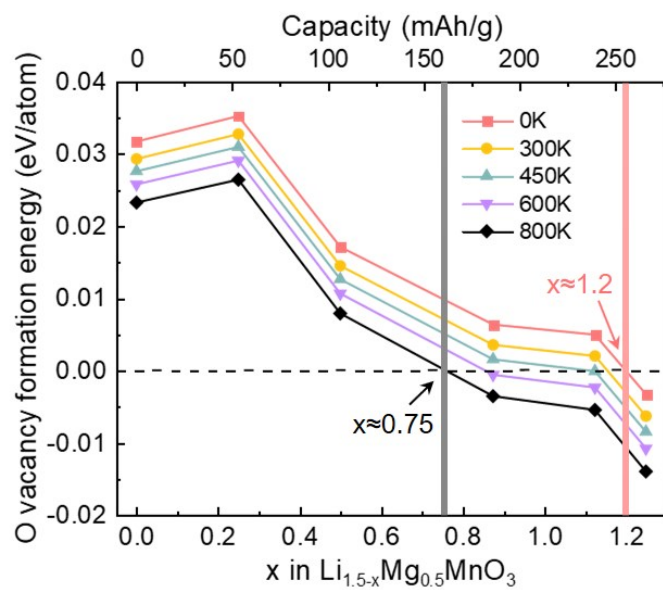

**Figure S6.** Formation energy of oxygen vacancy during delithiation at 0 K, 300 K, 450 K, 600K and 800 K respectively.

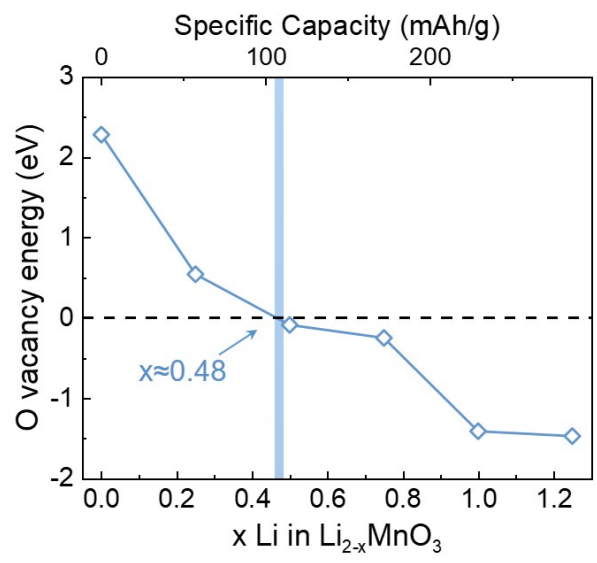

**Figure S7.** The reversible and irreversible regions in  $\text{Li}_2\text{MnO}_3$  are based on thermodynamics: oxygen vacancy formation energy (blue solid line) at  $\Delta E_{\text{vac}}=0$  (black dashed line),  $x \approx 0.48$  is the boundary between the reversible and irreversible regions.



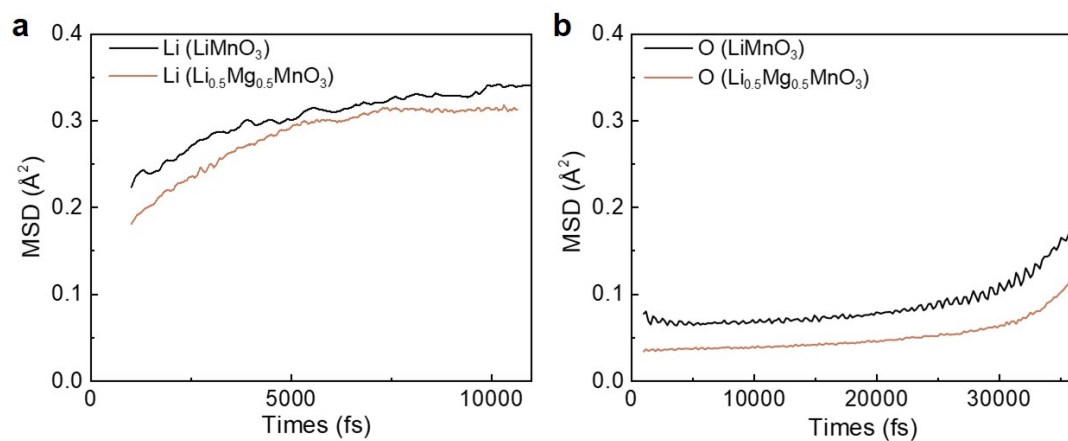

**Figure S8.** The Mean Square Displacement of Li and O in  $\text{LiMnO}_3$  and  $\text{Li}_{0.5}\text{Mg}_{0.5}\text{MnO}_3$  in ( $T=300\text{K}$ ).

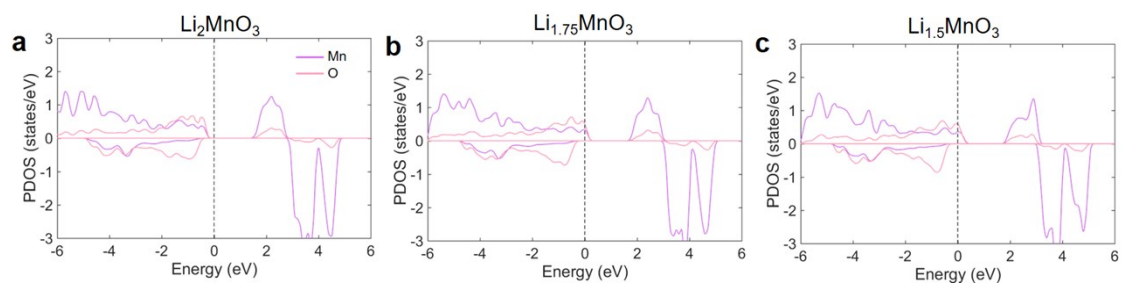

**Figure S9.** The pDOS of  $\text{Li}_{2-x}\text{MnO}_3$  ( $x=0, 0.25, 0.5$ ).

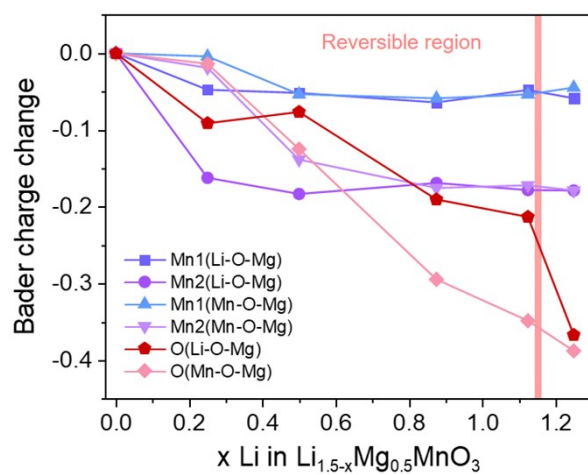

**Figure S10.** The Bader charge changes of oxygen and Mn ions during the delithiation.

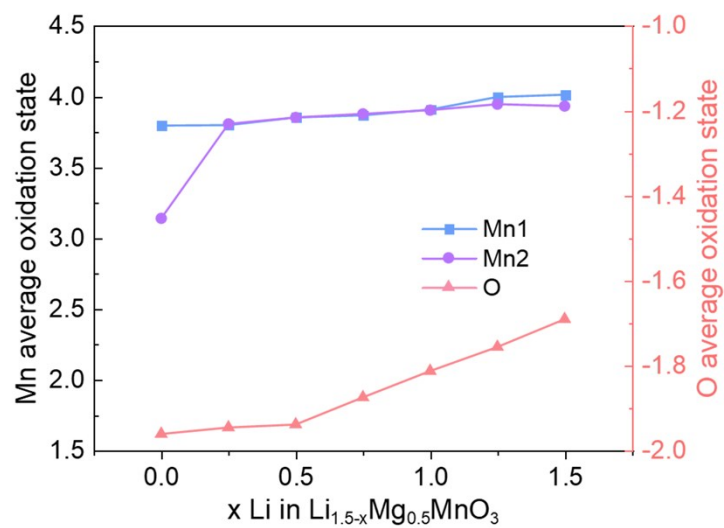

**Figure S11.** The calculated average oxidation state of Mn and O atoms as a function of delithiation ( $x$  in  $\text{Li}_{1.5-x}\text{Mg}_{0.5}\text{MnO}_3$ ). Two Mn-ions with linear and perpendicular distributions of 2(Mn-O-Mg) present different charge states of +3.8 (Mn1) and +3.15 (Mn2), respectively.
